# Supplementary material for: Interleukin-17 promotes angiogenesis by stimulating VEGF production of cancer cells via the STAT3/GIV signaling pathway in non-small-cell lung cancer
Source: PubMed Central journal article supplement (PMC4630609; doi:10.1038/srep16053), 2015-11-03
Supplement: srep16053-s1.pdf [file srep16053-s1.pdf]

# Interleukin-17 promotes angiogenesis by stimulating VEGF production of cancer cells via the STAT3/GIV signaling pathway in non-small-cell lung cancer

Pan B<sup>1</sup>, Shen J<sup>1</sup>, Cao JY<sup>1</sup>, Zhou YX<sup>2</sup>, Shang LH<sup>1</sup>, Jin S<sup>1</sup>, Cao SB<sup>1</sup>, Che DH<sup>1</sup>, Liu F<sup>1</sup>, Yan Y<sup>1</sup>

<sup>1</sup>Department of Medical Oncology, Harbin Medical University Cancer Hospital, Harbin 150081, PR China

<sup>2</sup>Department of general surgery, The Fourth Affiliated Hospital of Harbin Medical University, Harbin 150001, PR China

Correspondence and requests for materials should be addressed to Y. Yu (email: yuyan1291@126.com)

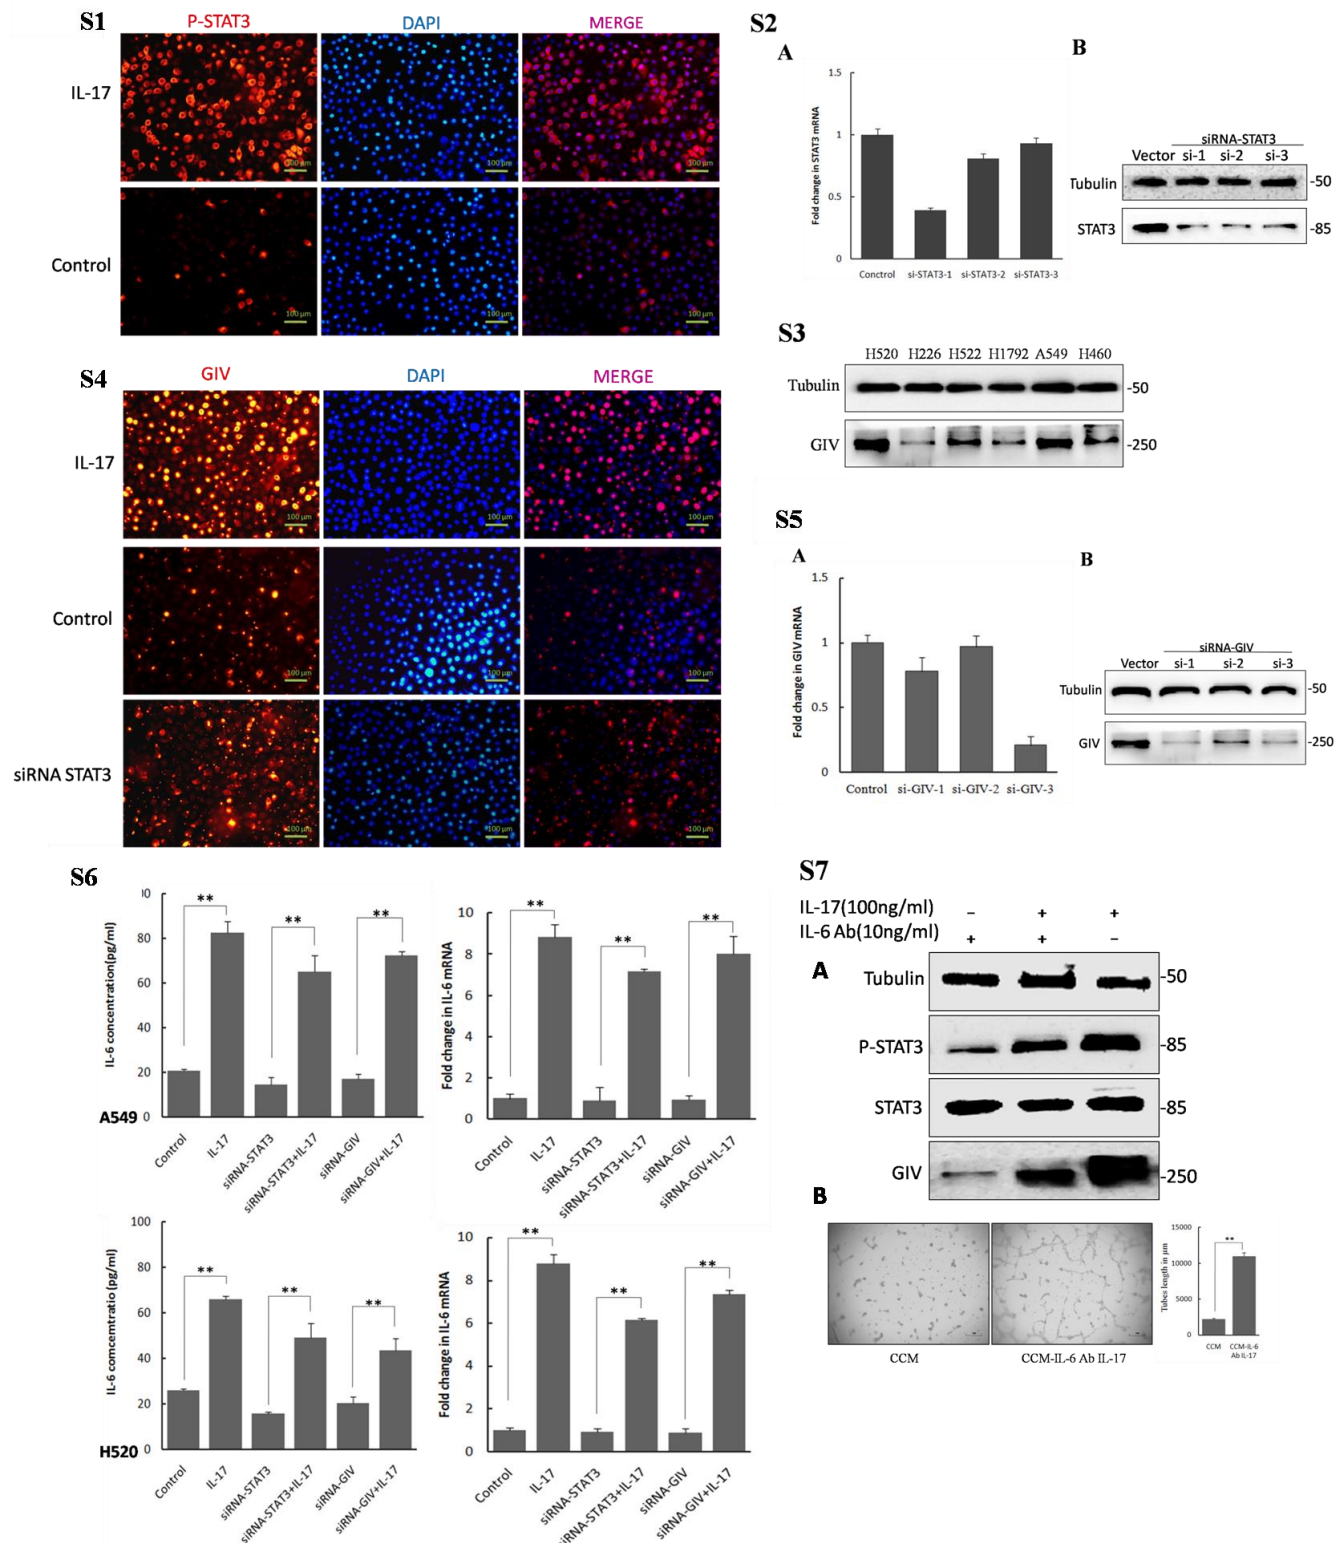

## Figures legends

**Fig.S1** Immunofluorescence assays showed that recombinant human IL-17(100ng/ml for 24h) significantly elevated the expression of p-STAT3 in H520 cells. Photomicrographs were taken at  $\times 200$  magnification. Control, PBS.

**Fig.S2** A549 cells were transfected with control or STAT3 siRNAs. The cells were incubated for 48 h, and the cell lysates were analyzed by (A) real-time PCR and (B) Western blot analyses.

**Fig.S3** Western blotting showed that expression of GIV in NSCLC cell lines.

**Fig.S4** Immunofluorescence assays showed that recombinant human IL-17(100ng/ml for 24h) significantly elevated the expression of GIV in H520 cells. However, the expression of GIV decreased if depleted of endogenous STAT3. The photomicrographs were taken at  $\times 200$  magnification.

**Fig.S5** A549 cells were transfected with control or GIV siRNAs. The cells were incubated for 48 h, and the cell lysates were analyzed by (A) real-time PCR and (B) Western blot analyses.

**Fig.S6** NSCLC cells were cultured for 24h with IL-17(100ng/ml) or PBS. Concentrations of IL-6 in culture supernatants were measured by ELISA, and mRNA of IL-6 in NSCLC cells were measured by Real-time PCR. IL-17 up-regulated the production of IL-6 by tumor cells, while both in siRNA-STAT3 and siRNA-GIV cells, IL-17-induced IL-6 upregulation was not affected.

**Fig.S7** IL-17 partially activates STAT3 and increased tube formation via IL-6 induction. A549 cells were treated with control, IL-17 or IL-17 and IL-6 mAb (5ng/ml). Cell lysates were analyzed by western blot(A) and CCM were harvested added to HUVECs plated on Matrigel for tube formation assay(B).

**Table S1** IL-17 affects the production of proangiogenic factors of NSCLC

| Angiogenic factors | H1792(pg/ml)      |                   |         | H460(pg/ml)      |                   |         |
|--------------------|-------------------|-------------------|---------|------------------|-------------------|---------|
|                    | Control           | IL-17             | p-value | Control          | IL-17             | p-value |
| IL-6               | 47.7 $\pm$ 4.5    | 83.4 $\pm$ 10.2   | 0.040   | 43.9 $\pm$ 0.4   | 103.0 $\pm$ 1.8   | <0.001  |
| IL-10              | 28.8 $\pm$ 0.7    | 28.9 $\pm$ 0.8    | 0.421   | 23.8 $\pm$ 2.0   | 24.2 $\pm$ 1.4    | 0.102   |
| IL-8               | 3353.5 $\pm$ 14.0 | 2789.1 $\pm$ 22.8 | 0.126   | 110.3 $\pm$ 10.2 | 388.9 $\pm$ 30.9  | 0.050   |
| bFGF               | 65.2 $\pm$ 2.6    | 84.3 $\pm$ 0.5    | 0.100   | 87.8 $\pm$ 2.3   | 84.3 $\pm$ 3.7    | 0.054   |
| VEGF               | 570.5 $\pm$ 17.6  | 1069.9 $\pm$ 5.7  | 0.012   | 493.9 $\pm$ 1.1  | 1772.1 $\pm$ 19.5 | 0.043   |
| PDGF               | 15.5 $\pm$ 0.4    | 12.3 $\pm$ 0.3    | 0.293   | 15.0 $\pm$ 1.6   | 20.6 $\pm$ 2.0    | 0.658   |
| Endostain          | 41.8 $\pm$ 0.1    | 31.3 $\pm$ 0.3    | 0.114   | 36.4 $\pm$ 0.1   | 21.5 $\pm$ 0.1    | 0.463   |

ELISA-determined cytokine levels were expressed as means $\pm$ SD. *p*-values were calculated by student's *t* test.

**Table S2** IL-17 and GIV expression in NSCLC and the relationship with patients' characteristics.

| Pathological features   | Total | IL-17 |      |                    | GIV |      |                    |
|-------------------------|-------|-------|------|--------------------|-----|------|--------------------|
|                         |       | Low   | High | <i>p</i> -value    | Low | High | <i>p</i> -value    |
| Age(years)              |       |       |      |                    |     |      |                    |
| <65                     | 36    | 19    | 17   |                    | 21  | 15   |                    |
| $\geq$ 65               | 31    | 12    | 19   | 0.250 <sup>a</sup> | 12  | 19   | 0.109 <sup>a</sup> |
| Gender                  |       |       |      |                    |     |      |                    |
| Female                  | 27    | 12    | 15   |                    | 12  | 15   |                    |
| Male                    | 40    | 19    | 21   | 0.806 <sup>a</sup> | 21  | 19   | 0.518 <sup>a</sup> |
| Smoking status          |       |       |      |                    |     |      |                    |
| Smoker                  | 49    | 23    | 26   |                    | 24  | 25   |                    |
| Non-smoker              | 18    | 8     | 10   | 0.856 <sup>a</sup> | 9   | 9    | 0.941 <sup>a</sup> |
| Tumour stage            |       |       |      |                    |     |      |                    |
| I and II                | 35    | 21    | 14   |                    | 19  | 16   |                    |
| III and IV              | 32    | 10    | 22   | 0.018 <sup>a</sup> | 14  | 18   | 0.389 <sup>a</sup> |
| Histological type       |       |       |      |                    |     |      |                    |
| Squamous cell carcinoma | 26    | 10    | 16   |                    | 12  | 14   |                    |

|                     |    |    |    |                    |    |    |                    |
|---------------------|----|----|----|--------------------|----|----|--------------------|
| Adenocarcinoma      | 33 | 17 | 16 |                    | 18 | 15 |                    |
| Others              | 8  | 4  | 4  | 0.580 <sup>b</sup> | 3  | 5  | 0.657 <sup>b</sup> |
| Differentiation     |    |    |    |                    |    |    |                    |
| Well differentiated | 24 | 12 | 12 |                    | 10 | 14 |                    |
| Moderately-poorly   | 43 | 19 | 24 | 0.647 <sup>a</sup> | 23 | 20 | 0.353 <sup>a</sup> |

<sup>a</sup> Pearson's  $\chi^2$  test.

<sup>b</sup> Fisher's exact test

**Table S3** Univariate and multivariate analyses of factors associated with survival

| Variables                                | A                  |          | B                  |          | C                  |          |
|------------------------------------------|--------------------|----------|--------------------|----------|--------------------|----------|
|                                          | HR (95% CI)        | <i>p</i> | HR (95% CI)        | <i>p</i> | HR (95% CI)        | <i>p</i> |
| Gender(female vs. male)                  | NA                 | NA       | NA                 | NA       | NA                 | NA       |
| Age, years(<65 vs. ≥65)                  | NA                 | NA       | NA                 | NA       | NA                 | NA       |
| Smoking status(smoker vs. nonsmoker)     | NA                 | NA       | NA                 | NA       | NA                 | NA       |
| TNM stage (I-II vs. III-IV)              | 0.311(0.165-0.586) | <0.001   | 0.293(0.154-0.557) | <0.001   | 0.294(0.152-0.568) | <0.001   |
| Differentiation (well vs. Moderate-poor) | NA                 | NA       | NA                 | NA       | NA                 | NA       |
| Histological type (ADC vs. non-ADC)      | NA                 | NA       | NA                 | NA       | NA                 | NA       |
| IL-17 expression (low vs. high)          | NA                 | NS       | NA                 | NA       | NA                 | NA       |
| GIV expression (low vs. high)            | NA                 | NA       | 0.467(0.250-0.872) | 0.016    | NA                 | NA       |
| Combination of IL-17 and GIV*            |                    |          |                    |          |                    |          |
| Overall                                  | NA                 | NA       | NA                 | NA       | NA                 | 0.004    |
| I vs II                                  | NA                 | NA       | NA                 | NA       | 3.141(1.484-6.647) | 0.002    |
| I vs III                                 | NA                 | NA       | NA                 | NA       | 2.544(1.154-5.606) | 0.017    |

Note: Multivariate analysis was performed using the Cox multivariate proportional hazard regression model with a stepwise method (forward, likelihood ratio).

Abbreviations: HR, hazard ratio; CI, confidence interval; ADC, adenocarcinoma; NA, not assessed; NS, not significant; TNM, tumor-node-metastasis.

\*I, IL-17 high and GIV high expression; II, IL-17 high, GIV low expression or IL-17 low, GIV high expression; III, IL-17 low and GIV low expression.
